# Supplementary material for: Nucleus pulposus primary cilia alter their length in response to changes in extracellular osmolarity but do not control TonEBP-mediated osmoregulation
Source: PubMed Central journal article supplement (PMC6820757; doi:10.1038/s41598-019-51939-7), 2019-10-29

## **Supplementary Information**

### **Nucleus pulposus primary cilia alter their length in response to changes in extracellular osmolarity but do not control TonEBP-mediated osmoregulation**

Hyowon Choi<sup>1,2</sup>, Vedavathi Madhu<sup>1</sup>, Irving M. Shapiro<sup>1,2</sup>,  
Makarand V. Risbud<sup>1,2\*</sup>

<sup>1</sup>Department of Orthopaedic Surgery, Sidney Kimmel Medical College, Thomas Jefferson University, Philadelphia, PA, USA

<sup>2</sup>Graduate Program in Cell Biology and Regenerative Medicine, Thomas Jefferson University, Philadelphia, PA, USA

# Supplementary Figure S1-1. Uncropped images of Western blots.

Uncropped western blot images for Figure 2b, 2e, 3b, and 3e.

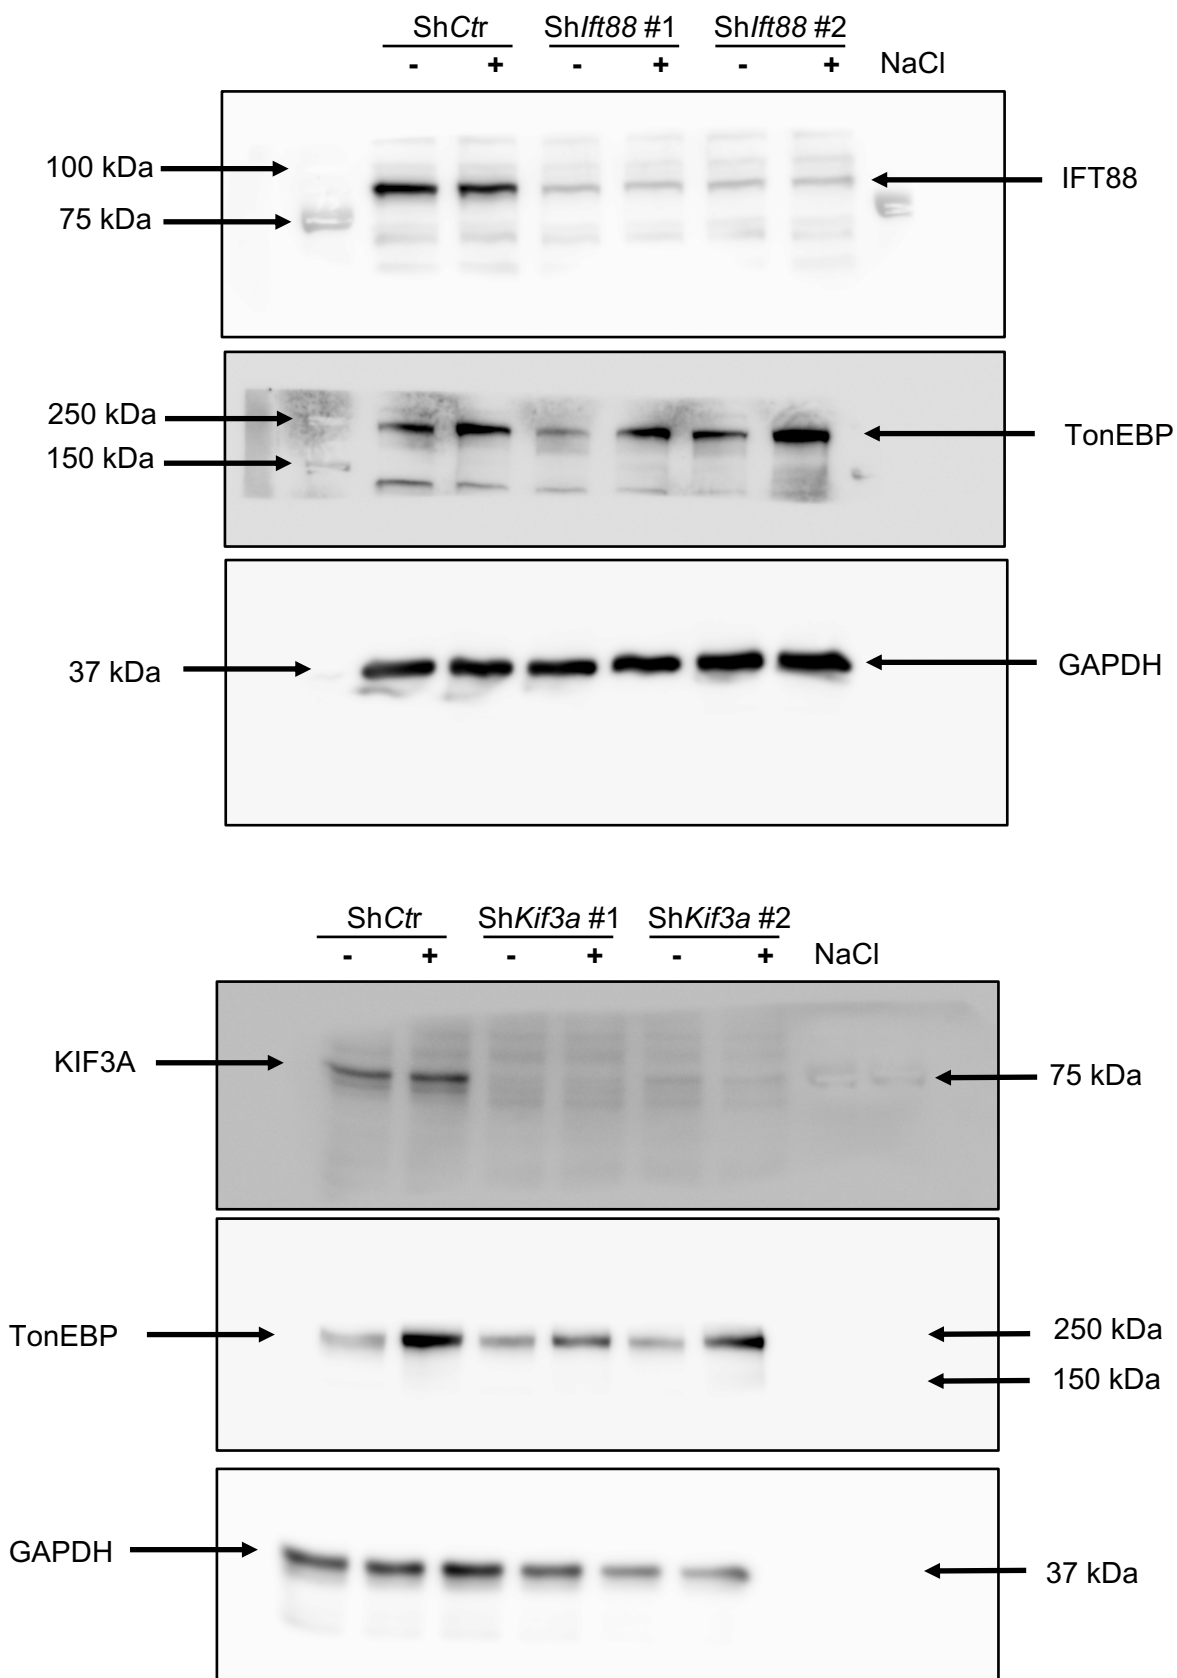

## Supplementary Figure S1-2. Uncropped images of Western blots.

Uncropped western blot images for Figure 6b and 6g.

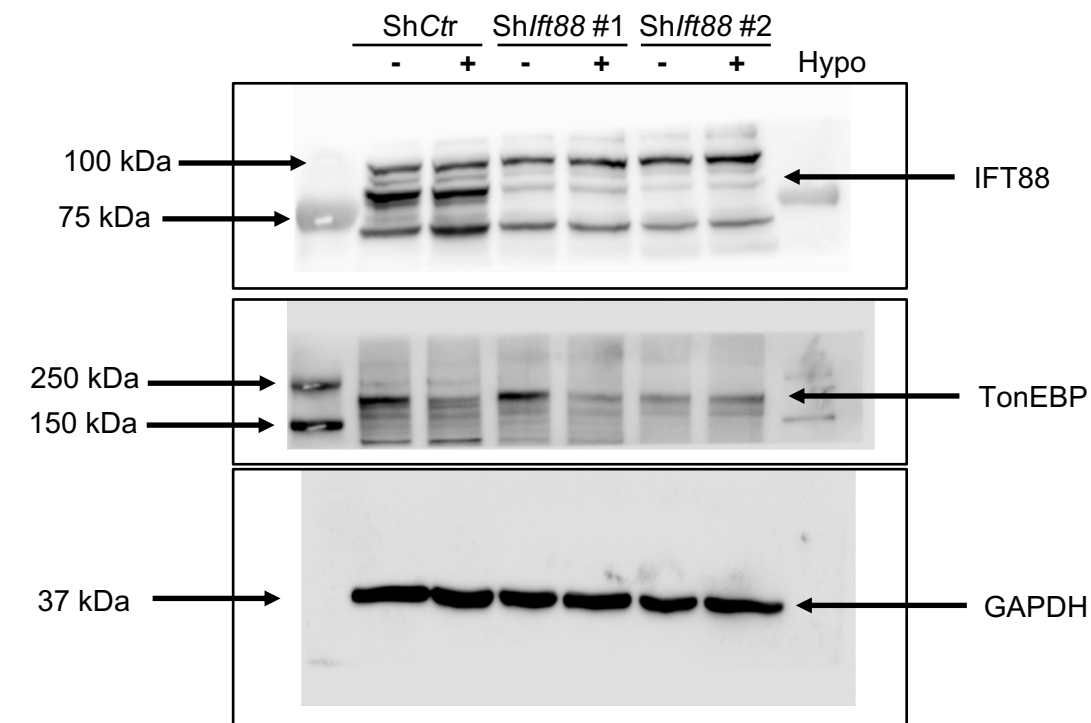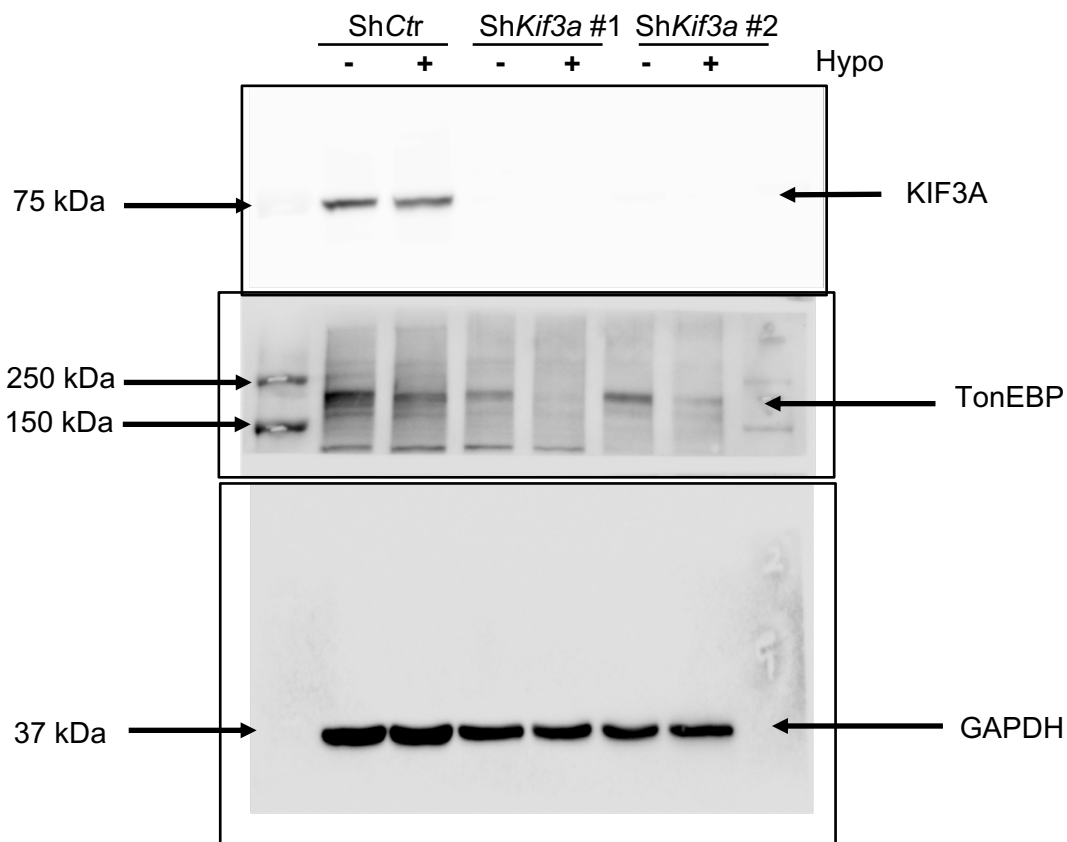

**Supplementary Figure S1-3. Uncropped images of Western blots.**  
Uncropped western blot images for Figure 8b.

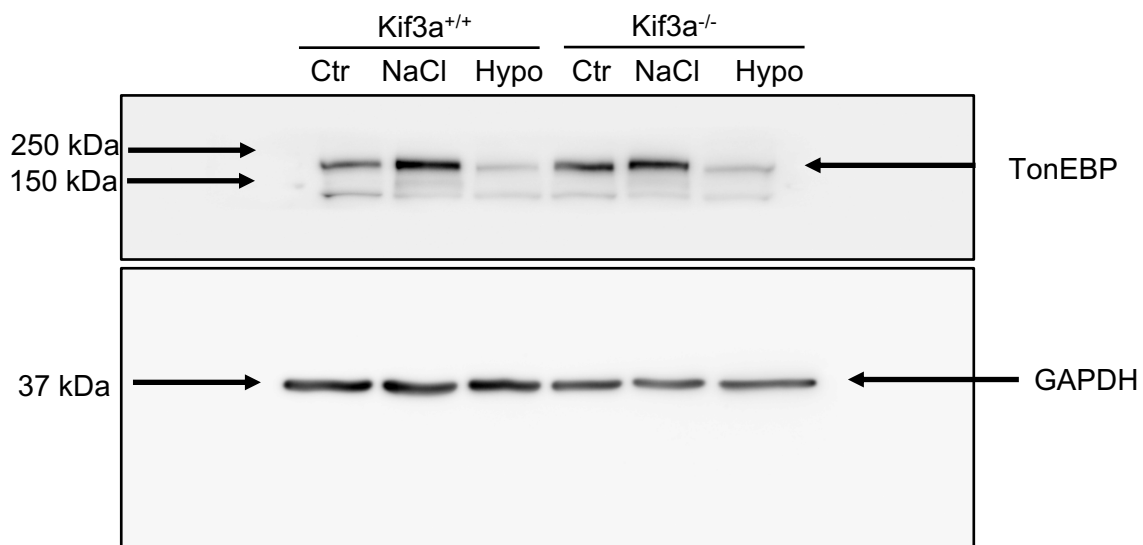

Supplement: 41598_2019_51939_MOESM1_ESM.pdf [file 41598_2019_51939_MOESM1_ESM.pdf]
